# Supplementary material
Source: Springer Nature journal article supplement (https://www.springermedizin.de/resource/supplementary/12916_2006_83_MOESM2_ESM.pdf/9599132)
Supplement: MOESM2 [file 9599132]

|                                             | Actor-oriented competition                                               | Public-oriented competition                                                                          |
|---------------------------------------------|--------------------------------------------------------------------------|------------------------------------------------------------------------------------------------------|
| Parallel competition (biomedical framework) | 1<br>Basic research<br>'Normal' (biomedical) scientific rationality      | 2<br>Applied (clinical) research<br>Technological rationality                                        |
| Counter-competition (paradigm conflict)     | 3<br>Medical philosophy (theory of science)<br>Philosophical rationality | 4<br>"Empowering" research (e.g. consultation research and gender research)<br>Political rationality |
